# Supplementary material
Source: HighWire-hosted journal article supplement (https://dmd.aspetjournals.org/highwire/filestream/74847/field_highwire_adjunct_files/0/90316_Supplemental_revised.pdf)

**Title Page**

**Role of Oatp2b1 in Drug Absorption and Drug-Drug Interactions**

Mingqing Chen, Shuiying Hu, Yang Li, Alice A. Gibson, Qiang Fu, Sharyn D. Baker, and Alex Sparreboom

*Experimental Cancer Pharmacology Laboratory, Division of Pharmaceutics and Pharmacology,  
College of Pharmacy, The Ohio State University, Columbus, Ohio.*

Figure S1. Relative expression of the OATP2B1Oatp2b1 gene in different gastro-intestinal segments of wild-type mice and OATP2B1Oatp2b1-knockout (OATP2B1Oatp2b1<sup>-/-</sup>) mice as determined by real-time RT-PCR. Data are presented as mean (bars) and SEM (error bars) of at least triplicate observations. Expression values were normalized to the housekeeping gene, GAPDHGapdh.

**Figure S2.** OATP2B1-mediated transport of fluvastatin. Uptake was evaluated in HEK293T cells transfected with an empty vector (VC), or Oatp2b1. Cells were incubated with and [<sup>3</sup>H]-E3S (2.5 μM) for 5 min or [<sup>3</sup>H]-fluvastatin (0.2 μM) for 15 min, and uptake values were normalized to those observed for the VC group. Data are presented as mean (bars) and SEM (error bars) of at least triplicate observations. \**P* < 0.05 vs VC.

Figure S3. Fluvastatin liver to plasma 4 h after oral administration in both male and female wild-type and knockout mice (N=5).

Figure S4. Fluvastatin liver to plasma 4 h after oral administration in vehicle- or erlotinib –treated wild-type and knockout mice (N=4).

## Supplemental Figure S1

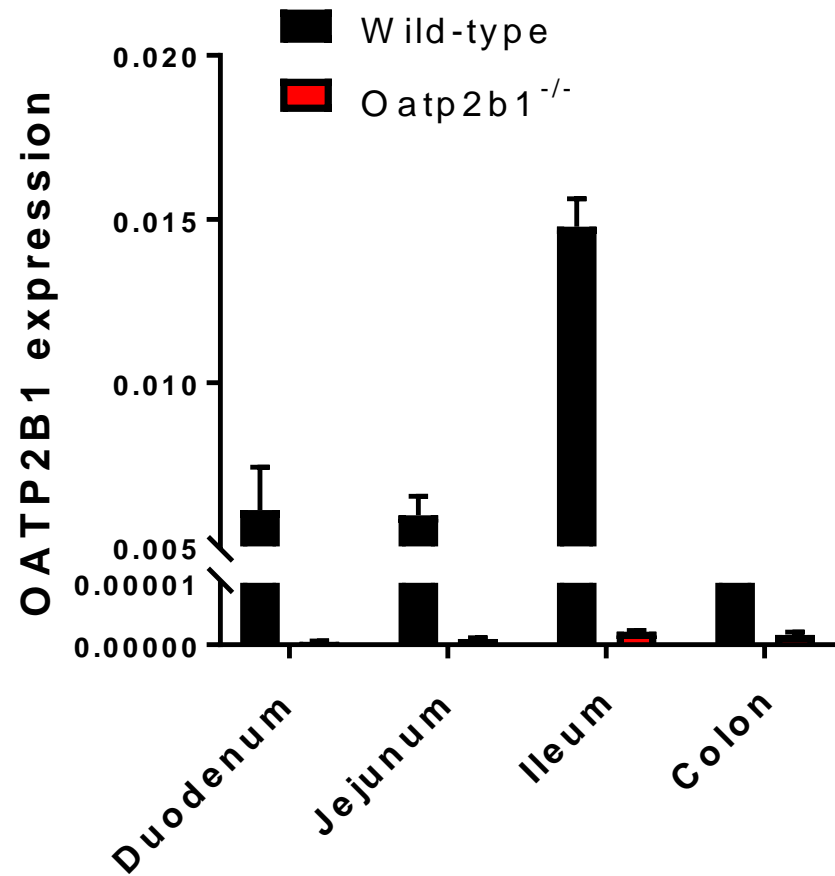

## Supplemental Figure S2

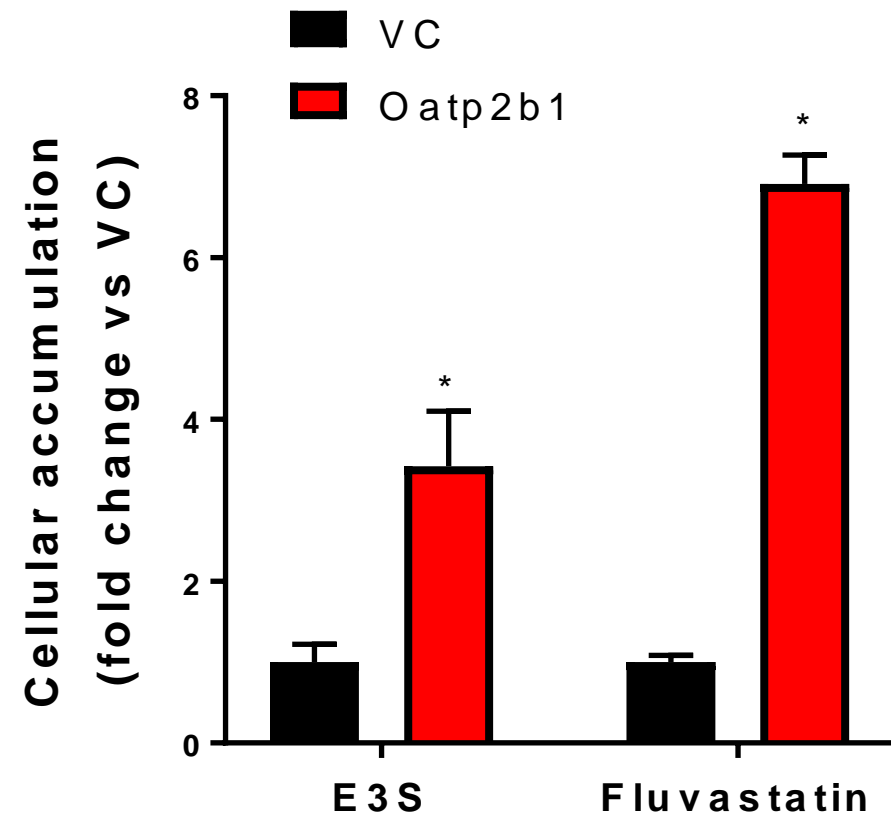

Supplemental Figure S3

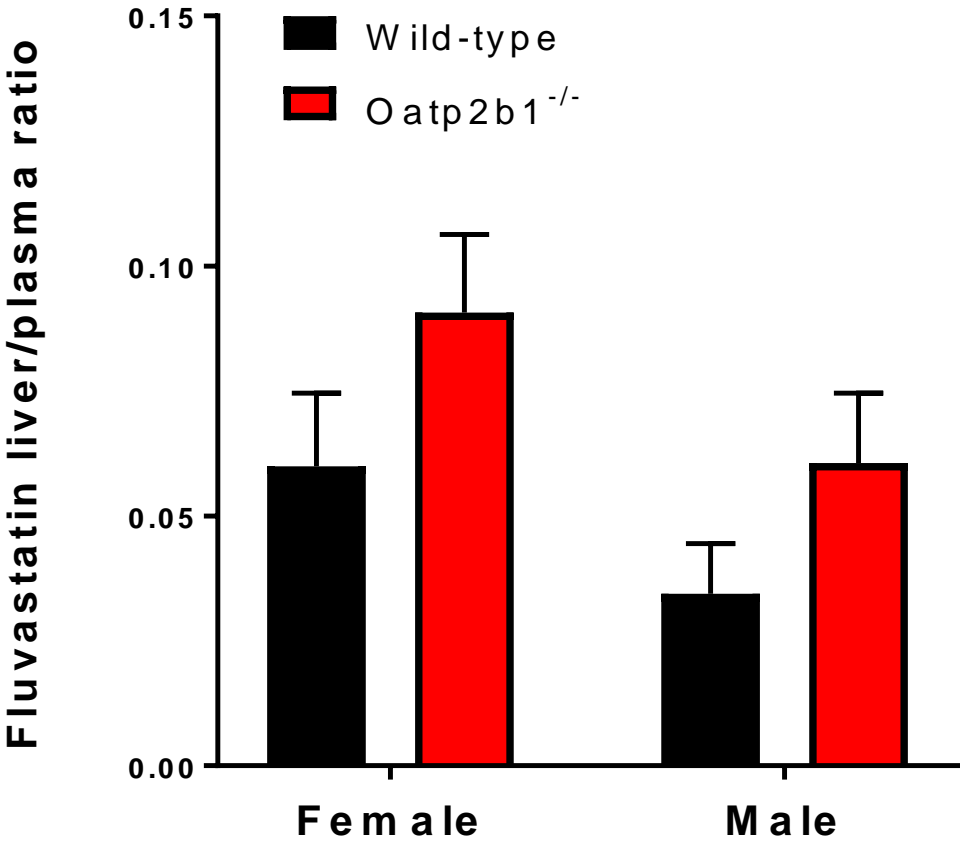

# Supplemental Figure S4

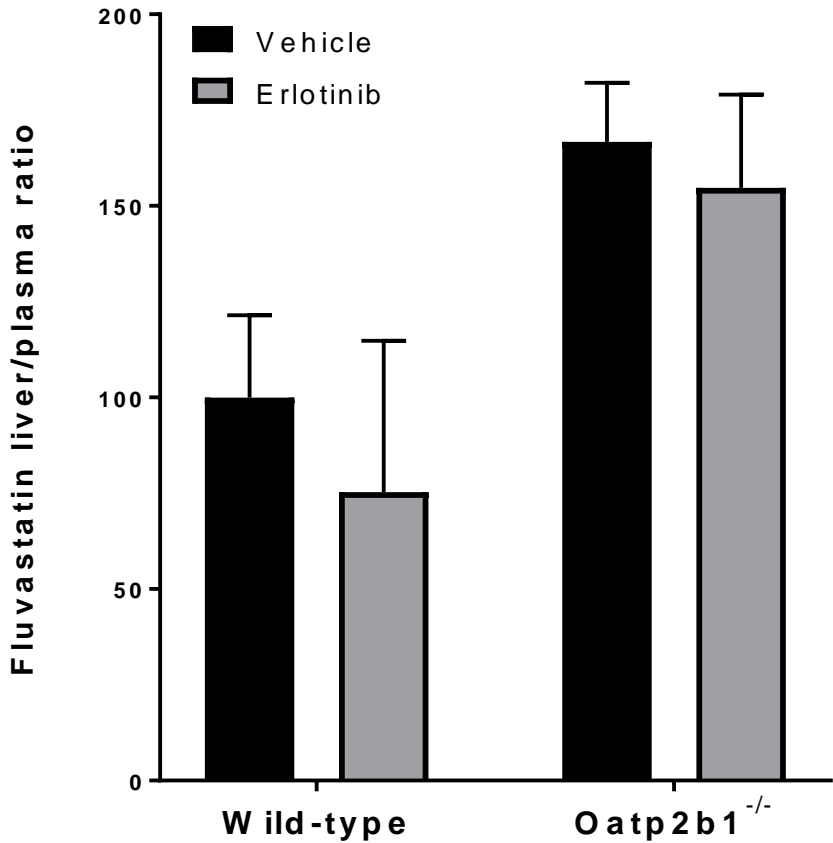

Supplement: 90316_Supplemental_revised.pdf [file 90316_Supplemental_revised.pdf]
